# Supplementary material for: Hawthorn Proanthocyanidin Extract Inhibits Colorectal Carcinoma Metastasis by Targeting the Epithelial-Mesenchymal Transition Process and Wnt/β-Catenin Signaling Pathway
Source: MDPI journal article supplement (doi:10.3390/foods13081171), 2024-04-12
Supplement: s1 [file s1]

## Supplementary Figure

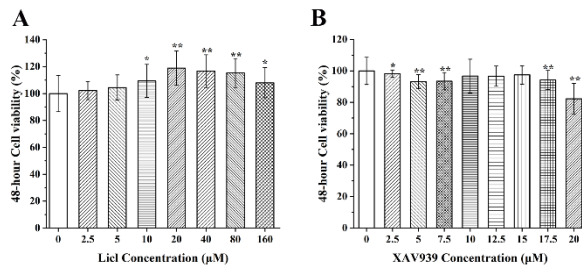

**Supplementary Figure S1.** Effects of Wnt signal pathway activator LiCl and inhibitor XAV939 on the viability of HCT116 cells. **(A)** Cell viability of HCT116 cells treated with LiCl for 48 h; **(B)** cell viability of HCT116 cells treated with XAV939 for 48 h. \*  $P < 0.05$ ; \*\*  $P < 0.01$ . Compared with the blank control group.
